# Supplementary material for: Impact of Repetitive DNA Elements on Snake Genome Biology and Evolution
Source: MDPI journal article supplement (doi:10.3390/cells10071707), 2021-07-06
Supplement: s1 [file s1]

**Table S1.** Details of samples used for transcriptomic analysis of repeat elements.

| Bioproject ID                      | Biosample ID | Tissue        | Number of sequenced bases | SRA Accession ID |
|------------------------------------|--------------|---------------|---------------------------|------------------|
| PRJNA527614<br>Indian Cobra        | SAMN11168471 | Spleen        | 9.9 Gb                    | SRR8754982       |
|                                    | SAMN11168472 | Brain         | 16.7Gb                    | SRR8754983       |
|                                    | SAMN11168473 | Heart         | 18.5 Gb                   | SRR8754985       |
|                                    | SAMN11168476 | Venom gland   | 25.8 Gb                   | SRR8754986       |
|                                    | SAMN11168475 | Pancreas      | 20.5 Gb                   | SRR8754987       |
|                                    | SAMN11168477 | Liver         | 17.2 Gb                   | SRR8754989       |
| PRJNA477004<br>Prairie Rattlesnake | SAMN09463176 | Female liver  | 1.1 Gb                    | SRR7401978       |
|                                    | SAMN09463178 | Female kidney | 940 MB                    | SRR7401980       |
|                                    | SAMN09463180 | Male liver    | 1.1 Gb                    | SRR7401982       |
|                                    | SAMN09463182 | Male kidney   | 1.2 Gb                    | SRR7401984       |
|                                    | SAMN07375499 | Venom         | 8 Gb                      | SRR5858075       |

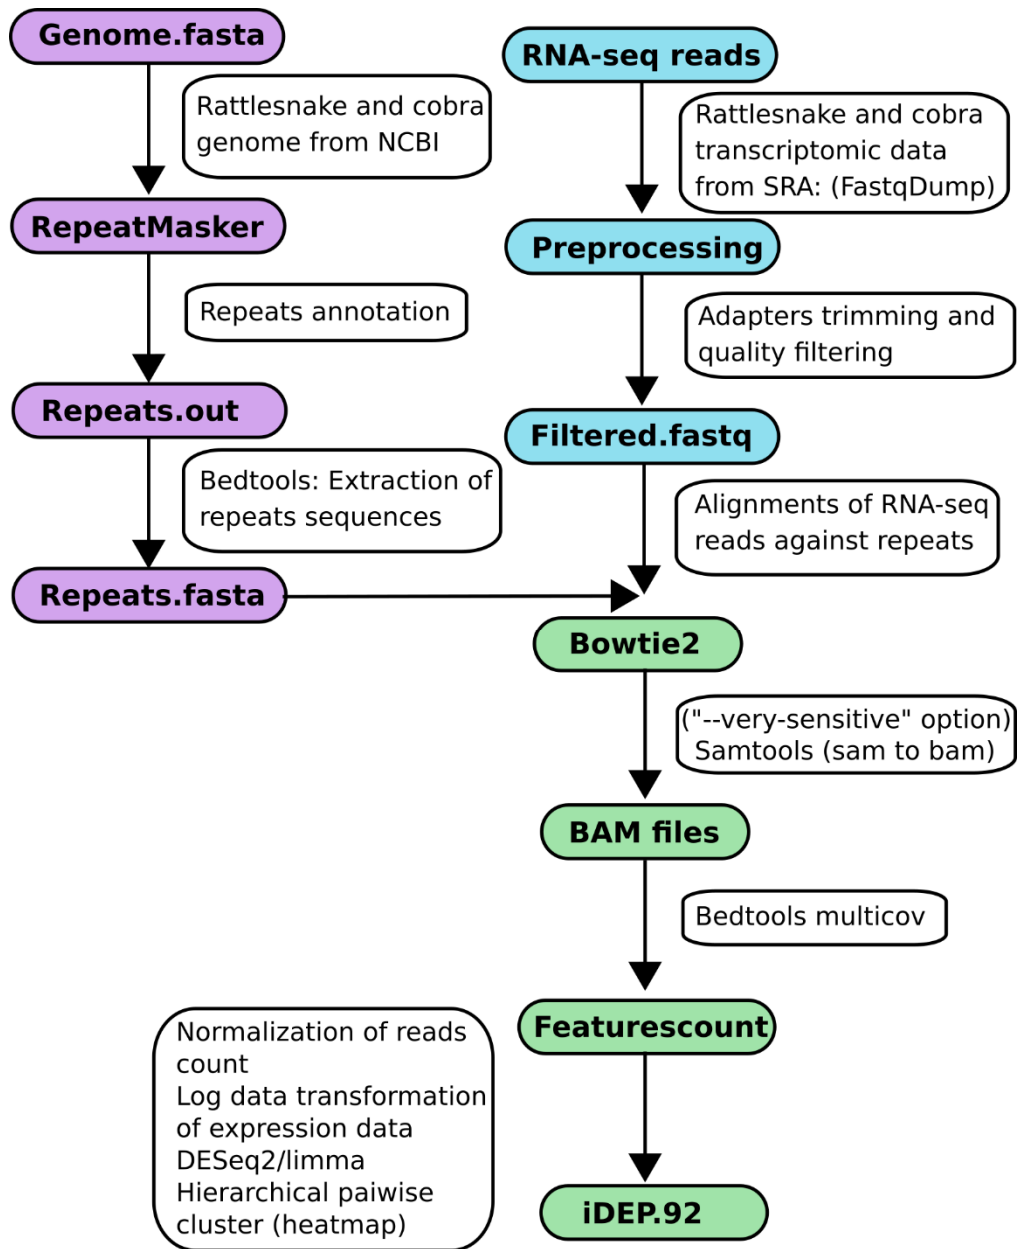

**Figure S1.** Workflow pipeline for measuring the expression of snake repeats.

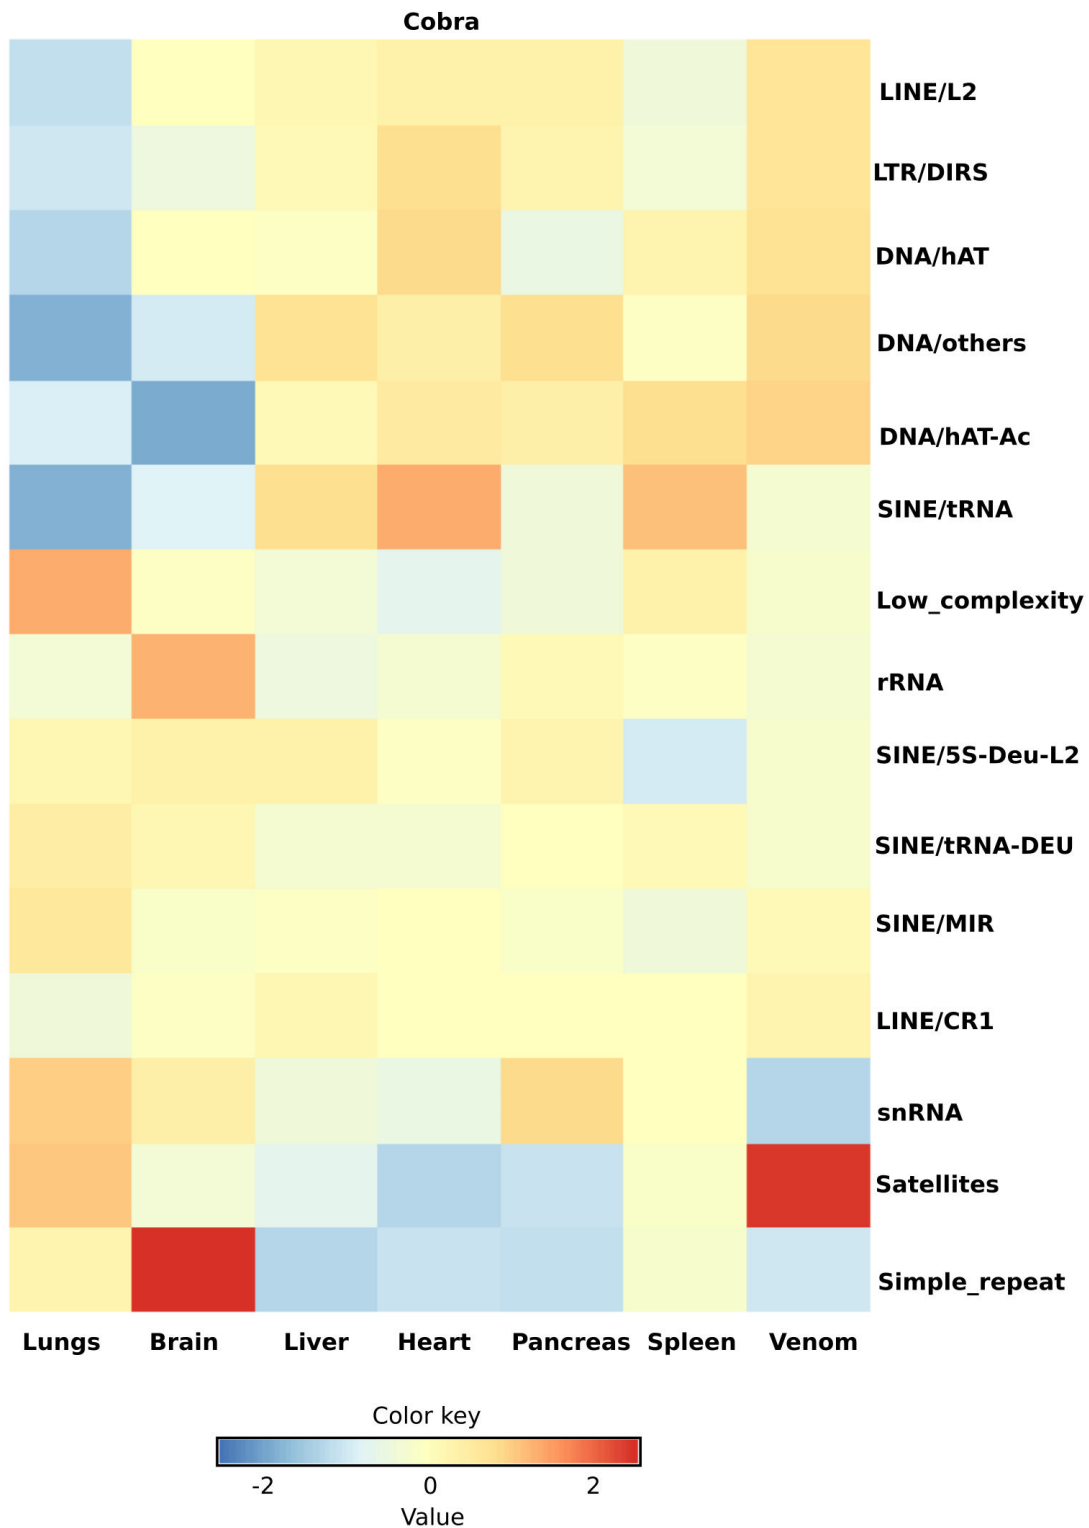

**Figure S2.** Heatmap illustrating differential expression data of genomic repeats in Indian cobra. Comparisons are shown for different tissue samples and repeat families on the x-axis and y-axis, respectively
